# Universality and non-universality of the growth law

Qirun Wang<sup>1</sup> and Jie Lin<sup>1,2</sup>

<sup>1</sup>Center for Quantitative Biology, Peking University, Beijing, China

<sup>2</sup>Peking-Tsinghua Center for Life Sciences, Peking University, Beijing, China

(Dated: December 3, 2021)

An approximately linear relationship between the fraction of ribosomal proteins in the proteome ( $\phi_R$ ) and the growth rate ( $\mu$ ) holds in proliferating cells when the nutrient quality changes, often referred to as a growth law. While a simple model assuming a constant translation speed of ribosomes without protein degradation can rationalize this growth law, real protein synthesis processes are more complex. This work proposes a general theoretical framework of protein synthesis, taking account of heterogeneous translation speeds among proteins and finite protein degradation. We introduce ribosome allocations as the fraction of active ribosomes producing certain proteins, with two correlation coefficients respectively quantifying the correlation between translation speeds and ribosome allocations, and between protein degradation rates and mass fractions. We prove that the growth law curve generally follows  $\phi_R = (\mu + c_1)/(c_2\mu + c_3)$  where  $c_1$ ,  $c_2$ , and  $c_3$  are constants depending on the above correlation coefficients and the translation speed of ribosomal proteins. Our theoretical predictions of  $\phi_R$  agree with existing data of *Saccharomyces cerevisiae*. We demonstrate that when different environments share similar correlation coefficients, the growth law curve is universal and up-bent relative to a linear line in slow-growth conditions, which appears valid for *Escherichia coli*. However, the growth law curve is non-universal and environmental-specific when the environments have significantly different correlation coefficients. Our theories allow us to estimate the translation speeds of ribosomal and non-ribosomal proteins based on the experimental growth law curves.

Cells can adapt to different environments and alter the expression levels of multiple genes correspondingly. The genome-wide gene expression profile can change significantly as cells switch between different environments. However, proliferating cells, including bacteria and unicellular eukaryotes, exhibit a simple growth law as the nutrient quality changes: an approximately linear relation exists between the fraction of ribosomal proteins in the proteome ( $\phi_R$ ) and the growth rates ( $\mu$ ),  $\phi_R = \mu/\kappa + \phi_0$  [1–6]. This growth law can be rationalized by a simple translation model (STM): ribosomes are engaged in translation with a constant translation speed that is proportional to  $\kappa$  [2, 4].  $\phi_0$  represents the fraction of inactive ribosomes that are not producing proteins, independent of environments in the STM. While the STM is simple and intuitive, it appears to break down in slow-growth conditions of *Escherichia coli* (doubling time longer than 60 mins at 37°C) in which more ribosomes are produced than the expectation from the STM [7].

We note that there are two important biological features (if not all) beyond the STM, which, as we show in this work, are crucial to interpret the experimental data of  $\phi_R$  versus  $\mu$  (the growth law curve). The first is the heterogeneous translation speeds of ribosomes producing different proteins. Recent studies demonstrated that the translation speeds are highly heterogeneous among different proteins due to multiple mechanisms, including codon usages [8] and amino acid compositions [9]. Because of the universalities of these mechanisms, one expects that heterogeneous translation speeds among proteins are universal across different organisms. In particular, the translation speeds of ribosomal proteins are

significantly slower than the average translation speed over non-ribosomal proteins due to the abundance of positively charged amino acids on ribosomal proteins [9]. Nowadays, the ribosome profiling technique allows us to quantify the allocation of ribosomes towards the production of different proteins. These experimental techniques enable us to rethink the growth law in the presence of heterogeneity in translation speeds [9].

The second feature is finite protein degradation rates. The STM neglects protein degradation and predicts that at zero growth rate,  $\phi_R = \phi_0$  so that all ribosomes are inactive. However, this contradicts with experiments of nongrowing bacteria in which significant translation activities are observed [10]. Protein degradation must be considered at zero growth rate to balance protein production to ensure a constant protein mass. Therefore, protein degradation should be important to the growth law, at least in slow-growth conditions.

In this work, we show that the heterogeneous translation speeds and finite protein degradations significantly influence the growth law connecting the fraction of ribosomal proteins and the growth rate when the nutrient quality changes. The fractions of ribosomal proteins  $\phi_R$  are generally different in different environments, even if they lead to the same growth rates. Besides the growth rate,  $\phi_R$  depends on two correlation coefficients among proteins. One is between the translation speeds and ribosome allocations, and the other is between the correlation coefficient between protein degradation rates and mass fractions. We compute the above correlation coefficients using proteomics and ribosomal profiling datasets of *S. cerevisiae* [11]. Interestingly, we find that the correlation

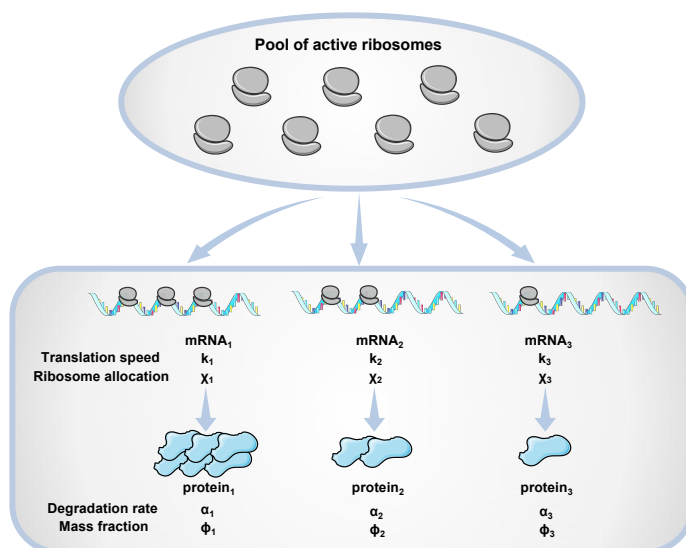

FIG. 1. Given a constant environment, cells actively allocate different fractions of active ribosomes ( $\chi_i$ ) to translate mRNAs corresponding to different proteins. In general, the translation speeds  $k_i$  are heterogeneous among proteins.  $\alpha_i$  is the degradation rate of protein  $i$ .  $\chi_i$ ,  $k_i$  and  $\alpha_i$  together determine the mass fraction of protein  $i$ . The ribosome allocation strategies reflect the adaption of cells to different environments. In this schematic, we show three proteins for simplicity.

70 between the translation speed and ribosome allocations 99  
 71 become stronger when the growth rate decreases; namely,  
 72 cells tend to produce more proteins with higher transla- 100  
 73 tion speeds in poor nutrient. In contrast, the correlation  
 74 between the protein degradation rates and mass fractions  
 75 is almost independent of growth rates.

76 We derive the general form of growth law involving  
 77 the above correlations. We demonstrate that for envi-  
 78 ronments with similar correlation coefficients, the growth  
 79 law curve is universal and has the following form,  $\phi_R =$   
 80  $(\mu + c_1)/(c_2\mu + c_3)$  where  $c_1$ ,  $c_2$ , and  $c_3$  are constants  
 81 depending on the above correlation coefficients and the  
 82 translation speed of ribosomal proteins. We prove that  
 83 the growth law curve must be monotonically increasing  
 84 and convex, which justifies the upward bending of the  
 85 growth law curve of *E. coli* observed in slow-growth con-  
 86 ditions relative to a linear line [7]. However, if the exper-  
 87 iments are implemented in multiple environments with  
 88 dramatically different correlation coefficients, the growth  
 89 law curve is generally non-universal and environmental-  
 90 specific. Our analysis of experimental data suggests that  
 91 this scenario may apply to *S. cerevisiae*. Our theories al-  
 92 low us to fit the experimentally measured growth law  
 93 curves by our model predictions, from which we can  
 94 estimate the translation speed of ribosomal and non-  
 95 ribosomal proteins. Consistent with direct experimen-  
 96 tal measurements [9], the estimated translation speed  
 97 of ribosomal proteins is indeed much slower than non-  
 98 ribosomal proteins.

## RESULTS

### Model of protein synthesis

101 Given a constant environment, we consider a popula-  
 102 tion of cells with a constant growth rate, and the protein  
 103 synthesis processes are in a steady state. Ribosome pro-  
 104 filing allows us to quantify the fraction of ribosomes in  
 105 the pool of total active ribosomes producing protein  $i$ ,  
 106 which we call ribosome allocation  $\chi_i$ . Here the index  
 107  $i$  represents one particular protein  $i$ . Mass spectrome-  
 108 try also allows us to measure the mass fractions  $\phi_i$  of  
 109 all proteins in the proteome [12]. The elongation rate  
 110 of ribosomes on the corresponding mRNAs is  $v_i$ , which  
 111 is the number of translated amino acids per unit time.  
 112 Note that  $v_i$  is the averaged elongation rate over the se-  
 113 quence of the corresponding mRNA so that each protein  
 114 has one  $v_i$ . We also assume that protein  $i$  degrades with  
 115 a constant rate  $\alpha_i$ . The mass production rate of protein  
 116  $i$  becomes

$$\frac{dM_i}{dt} = v_i a_i \chi_i (R - R_0) - \alpha_i M_i. \quad (1)$$

117 Here  $R$  is the number of ribosomes, and  $R_0$  is the number  
 118 of inactive ribosomes.  $a_i$  is the averaged mass of amino  
 119 acids over the sequence of protein  $i$ . In the following anal-  
 120 ysis, we define  $k_i = v_i a_i$  as the amino acid mass-weighted  
 121 translation speed and denote it as the translation speed  
 122 for simplicity. Our model is summarized in Figure 1.

123 Recently, Dai et al. showed that for *E. coli* the trans-  
 124 lation speeds of many proteins decrease as the growth  
 125 rate decreases, but maintain finite values at zero growth

rate [7]. They proposed a model in which the translation speeds are the same for all proteins and depend on the ribosomal fraction  $\phi_R$  in a Michaelis-Menten way, consistent with their experimental data. However, their model predicts a downward bending of the growth law curve in slow-growth conditions relative to a linear line, in contrast to the upward bending observed experimentally. To reconcile the conflict, they proposed that the fraction of inactive ribosomes  $\phi_0$  increases as the growth rate decreases, generating the upward bending of the growth law curve. However, as far as we know, there is no direct experimental evidence supporting a larger fraction of inactive ribosomes  $\phi_0$  in slow-growth conditions than in fast-growth conditions. Interestingly, no noticeable bending is observed in the growth law curve of *S. cerevisiae* [6], suggesting that the upward bending of the growth law curve in slow-growth conditions may not be universal across organisms, consistent with our theoretical predictions as we show later.

We remark that a growth-rate dependent translation speed is undoubtedly a mechanism that the STM breaks down. However, in this work, we focus on the effects of heterogeneous translation speeds  $k_i$  and finite degradation rates  $\alpha_i$ . Therefore, we assume them to be invariant of environments. We also mainly consider the effects of nutrient quality and do not consider the impact of antibiotics in this work, which can decrease the overall effective translation speed and increase  $\phi_R$  as the growth rate decreases [4]. Thanks to the simplicity of our protein synthesis model, it can be analytically solved, and the predictions are intriguing as we show later.

We define the total protein mass  $M = \sum_i M_i$ , and the protein mass fraction  $\phi_i = M_i/M$ . Using Eq. (1), we find the values of  $\phi_i$  in the steady state as (see detailed derivations in Appendix A)

$$\phi_i = \frac{k_i \chi_i (\phi_R - \phi_0)}{m_R (\mu + \alpha_i)}. \quad (2)$$

Here  $\mu$  is the growth rate of the total protein mass  $\mu = \dot{M}/M$ , and  $m_R$  is the total amino acid mass of a single ribosome. Since all proteins grow in the same rate in the steady-state, the growth rates of protein  $i$  defined as  $\mu_i = \dot{M}_i/M_i = k_i \chi_i (\phi_R - \phi_0)/(m_R \phi_i) - \alpha_i$  must be equal to  $\mu$ , which can be easily verified using Eq. (2). In the following,  $i = 1$  is reserved for ribosomal proteins so that  $\phi_1 = \phi_R$  and  $\mu_1 = \mu_R = k_R \chi_R (1 - \phi_0/\phi_R)/m_R - \alpha_R$ . Here,  $k_R$  and  $\alpha_R$  are the effective translation speed, and degradation rate of the coarse-grained ribosomal protein averaged over all ribosomal proteins. They are approximately independent of environments due to the tight regulation of relative doses of different ribosomal proteins [13] and their generally low degradation rates.

Given the ribosome allocations  $\chi_i$ , the protein degradation rates  $\alpha_i$  and the translation speeds  $k_i$ , one obtains a unique solution of  $\phi_i$  and  $\mu$ . We can express the growth rate as  $\mu = \sum_i \phi_i \mu_i$  and rewrite Eq. (2) to obtain the

expression of  $\phi_R$  as (see detailed derivations in Appendix B)

$$\phi_R = \frac{m_R (\mu + \sum_i \alpha_i \phi_i)}{\sum_i k_i \chi_i} + \phi_0. \quad (3)$$

Here,  $\phi_0$  is the mass fraction of inactive ribosomes, which we assume to be constant in the following. It is easy to find that if all proteins have the same translation speed ( $k_i = k$  for all  $i$ ) and protein degradations are negligible ( $\alpha_i = 0$ ), Eq. (3) is reduced to the STM result.

### Effects of heterogeneous translation speeds

To better understand the effects of heterogeneous translation speeds and degradation rates, we choose to study them separately. Therefore, we first simplify the model by taking  $\alpha_i = 0$  for all proteins and only consider the effects of heterogeneous translation speeds  $k_i$ . We rewrite  $\sum_i k_i \chi_i = k_R \chi_R + (1 - \chi_R) \sum_{i=2}^N k_i \tilde{\chi}_i$  in Eq. (3). Here,  $N$  is the number of genes and  $\chi_i = (1 - \chi_R) \tilde{\chi}_i$  so that  $\sum_{i=2}^N \tilde{\chi}_i = 1$ .  $k_R$  is the translation speed of ribosomal proteins. In the following, we define  $\langle k \rangle_\chi = \sum_{i=2}^N k_i \tilde{\chi}_i$  as the  $\chi$ -weighted average translation speed over all non-ribosomal proteins. As we derive in Appendix C, the fraction of ribosomal proteins can be written exactly as a Hill function of the growth rate:

$$\phi_R = \frac{\mu}{a\mu + b} + \phi_0, \quad (4)$$

where

$$a = \frac{k_R - \langle k \rangle_\chi}{k_R (1 - \phi_0) + \langle k \rangle_\chi \phi_0}, \quad (5)$$

$$b = \frac{k_R \langle k \rangle_\chi}{m_R [k_R (1 - \phi_0) + \langle k \rangle_\chi \phi_0]}. \quad (6)$$

We are particularly interested in the sign of  $a$  because it determines the shape of the  $\phi_R(\mu)$  curve. If  $k_R$  is smaller than  $\langle k \rangle_\chi$ ,  $a$  is negative so that the second derivative of the  $\phi_R(\mu)$  curve is positive. In other words, the  $\phi_R(\mu)$  curve is upward bent in slow-growth conditions.

$\langle k \rangle_\chi$  depends on both the elongation speeds  $k_i$  and the ribosome allocations  $\chi_i$ . To find its value, we further rewrite  $\langle k \rangle_\chi = \langle k \rangle (1 + I_{\chi,k})$ . Here  $\langle k \rangle$  is the arithmetic average of translation speeds over all non-ribosomal proteins, which is constant and independent of environments.  $I_{\chi,k}$  is a metric we use to quantify the correlation between the ribosome allocations and the translation speeds:

$$I_{\chi,k} = \frac{\langle \tilde{\chi}_i k_i \rangle - \langle \tilde{\chi}_i \rangle \langle k \rangle}{\langle \tilde{\chi}_i \rangle \langle k \rangle}. \quad (7)$$

Here, the bracket represents an average over all non-ribosomal proteins. Because the ribosome allocations  $\chi_i$

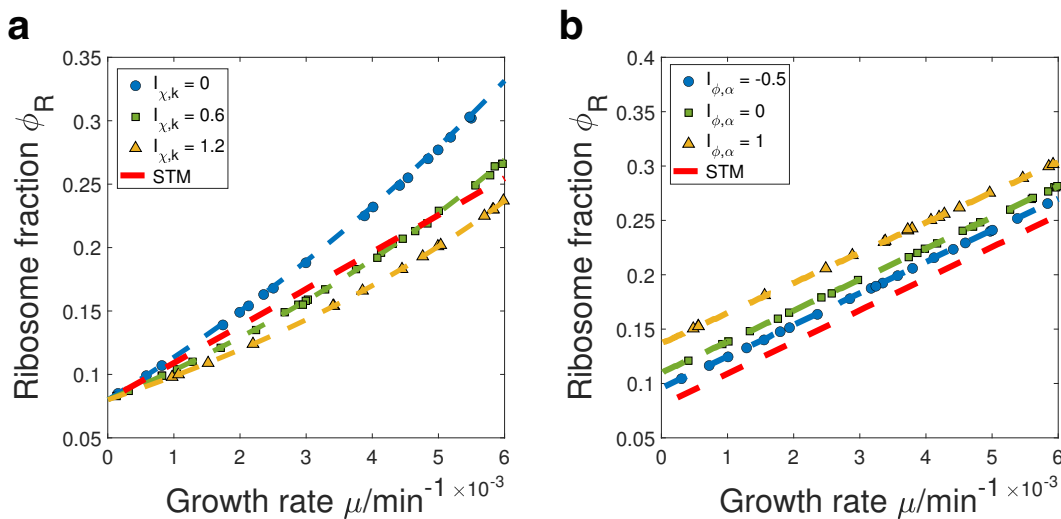

FIG. 2. Numerical simulations of the growth law curves. (a) We simulate the case of heterogeneous translation speeds and compare our numerical simulations with model predictions (dashed lines). Each data point has its own randomly sampled  $\chi_i$  and we show the results with preselected  $I_{\chi,k}$  values. The red dash line represents the predictions of the STM in which all proteins have the same translation speed  $\langle k \rangle$ . (b) Same analysis in which we simulate the case of finite protein degradation rates.

are generally different in different environments, we use  $I_{\chi,k}$  to characterize an environment. Imagine that we grow cells in multiple environments with equal  $I_{\chi,k}$ . We find that as long as  $I_{\chi,k}$  is not too close to  $-1$ , which we confirm later using experimental data,  $a$  is always negative since the translation speed of ribosomal proteins  $k_R$  is much lower than  $\langle k \rangle$  [9]. Therefore, Eq. (4) predicts an upward bending of the  $\phi_R(\mu)$  curve in slow-growth conditions.

We verify the above theoretical predictions by numerically simulating the model of protein synthesis (Appendix E). The translation speeds are randomly sampled among proteins and fixed for all environments, with  $k_R < \langle k \rangle$ . We randomly sample  $\chi_i$  for each environment and compute the resulting growth rate  $\mu$  and protein mass fractions  $\phi_i$ . We show the results from environments with preselected  $I_{\chi,k}$ , which agree well with the theoretical formula Eq. (4) (Figure 2a).

### Effects of finite protein degradation rates

We now discuss the effects of finite protein degradation rates. For simplicity, we assume that the translation speeds are homogeneous and equal to  $k$  for all proteins. We rewrite the  $\sum_i \alpha_i \phi_i$  term in Eq. (3) such that  $\sum_i \alpha_i \phi_i = \alpha_R \phi_R + (1 - \phi_R) \sum_{i=2}^N \alpha_i \tilde{\phi}_i$ . Here,  $\phi_i = (1 - \phi_R) \tilde{\phi}_i$  so that  $\sum_{i=2}^N \tilde{\phi}_i = 1$ . We define the  $\phi$ -averaged degradation rates over all non-ribosomal proteins as  $\langle \alpha \rangle_\phi = \sum_{i=2}^N \alpha_i \tilde{\phi}_i$ . Therefore, Eq. (3) can be written as

$$\phi_R = \frac{\mu + c}{k/m_R + d} + \phi_0. \quad (8)$$

where

$$c = \langle \alpha \rangle_\phi (1 - \phi_0) + \alpha_R \phi_0, \quad (9)$$

$$d = \langle \alpha \rangle_\phi - \alpha_R. \quad (10)$$

To find the sign of  $d$ , we further rewrite  $\langle \alpha \rangle_\phi$  as  $\langle \alpha \rangle_\phi = \langle \alpha \rangle (1 + I_{\phi,\alpha})$  where  $\langle \alpha \rangle$  is the arithmetic average of degradation rates over all non-ribosomal proteins.  $I_{\phi,\alpha}$  is a metric we use to characterize an environment by quantifying the correlation between the protein mass fractions and degradation rates:

$$I_{\phi,\alpha} = \frac{\langle \tilde{\phi}_i \alpha_i \rangle - \langle \tilde{\phi}_i \rangle \langle \alpha \rangle}{\langle \tilde{\phi}_i \rangle \langle \alpha \rangle}. \quad (11)$$

Here, the bracket represents an average over all non-ribosomal proteins.

Imagine that we grow cells in multiple environments with equal  $I_{\phi,\alpha}$ . We assume that the degradation rate of ribosomal protein  $\alpha_R$  is slower than the average of non-ribosomal proteins  $\langle \alpha \rangle$ , which is biologically reasonable since ribosomal proteins are generally non-degraded. Therefore, as long as  $I_{\phi,\alpha}$  is not too close to  $-1$ , which we confirm later using experimental data,  $d$  is positive since  $\alpha_R$  is always smaller than  $\langle \alpha \rangle_\phi$ . Therefore, our model predicts that the growth law curve is linear given a constant  $I_{\phi,\alpha}$  and finite protein degradation decreases the slope relative to the STM. The intercept at  $\mu = 0$  is also

larger than  $\phi_0$ . Therefore, a finite fraction of ribosomes are still actively translating at zero growth rate. We verify the above theoretical predictions by numerical simulations and randomly sample the protein degradation rates that are fixed for all environments, with  $\alpha_R < \langle \alpha \rangle$  satisfied. We show the results from environments with preselected  $I_{\phi,\alpha}$  and our theoretical predictions Eq. (8) are nicely confirmed (Figure 2b).

### The full model

We now consider the full model with both the heterogeneities in the translation speeds and protein degradation rates. We find that the growth law curve has the following general form,

$$\phi_R = \frac{\mu + c_1}{c_2\mu + c_3}, \quad (12)$$

where the expression of the constants,  $c_1$ ,  $c_2$  and  $c_3$  are shown in Appendix D. We prove that given fixed  $I_{\chi,k}$  and  $I_{\phi,\alpha}$  (as long as they are not too close to  $-1$ ), the growth law curve must be monotonically increasing and convex, which suggests an upward bending in slow-growth conditions (Appendix D). The simulation results again match well with the theoretical predictions (Figure 3a).

In real situations, we remark that the actual growth curve shape depends on the particular environments. To verify this, we compute the resulting growth law curve with multiple environments, and the  $I_{\chi,k}$  and  $I_{\phi,\alpha}$  of each environment are randomly sampled from Gaussian distributions (Figure 3b and e) (Appendix E). We find that when the Gaussian distributions have large standard deviations, the growth law curve is non-universal and depends on the particular chosen environments (Figure 3c). This means that if we randomly pick some environments from Figure 3c, the resulting growth law curves are generally different. In contrast, when the Gaussian distributions have small standard deviations, the growth law curve is well captured by our theoretical predictions Eq. (12), because the environments share similar  $I_{\chi,k}$  and  $I_{\phi,\alpha}$  (Figure 3f).

To quantify the effects of heterogeneous  $I_{\chi,k}$  and  $I_{\phi,\alpha}$  across environments, we repeatedly sample 20 random points from Figure 3c, f and fit them using Eq.(12) (Appendix E). We find that when the chosen environments have significantly different  $I_{\chi,k}$  and  $I_{\phi,\alpha}$ , the median root mean squared error  $\text{RMSE} = 1.69 \times 10^{-2}$  (Figure 3d). In contrast, in the case of similar environments,  $\text{RMSE} = 4.44 \times 10^{-3}$  (Figure 3g). The above results suggest that we can use the fitting error as a criterion of the universality of the growth law curve, which we apply to the experimental data later.

### Experimental tests of theories

In this section, we test our model using published datasets of *S. cerevisiae* [14] (Appendix F). For each strain and nutrient quality, we computed the correlation coefficients between the translation speeds and ribosome allocations  $I_{\chi,k}$ , and the correlation coefficients between the protein degradation rates and protein mass fractions  $I_{\phi,\alpha}$ . Given the values of  $\mu$ ,  $I_{\chi,k}$ , and  $I_{\phi,\alpha}$ , we predicted the fraction of ribosomal proteins  $\phi_R$  using Eq. (12) (Figure 4a and e). We note that there is one parameter  $\phi_0$  that is not known experimentally. Interestingly, by choosing a common  $\phi_0 = 0.048$ , our model predictions nicely match the experimental measured values of  $\phi_R$  (with one data point slightly above the theoretical prediction). We find that regardless of the data processing procedures, the relative relationships between the predicted curves always agree with that of the experimental values (Appendix F and Supplementary Figure S1).

Our model is simplified as we assume that the translation speeds and protein degradation rates do not depend on environments. Remarkably, our model predictions still quantitatively match the experimental observations, suggesting that our assumptions may be good approximations for most situations. While our model cannot predict the growth rate dependence of  $\phi_0$ , our results show that a constant fraction of inactive ribosomes is consistent with existing datasets of *S. cerevisiae*.

Interestingly, we found that  $I_{\phi,\alpha} \approx -0.33$  for all the conditions we computed. However,  $I_{\chi,k}$  are negatively correlated with the growth rates, suggesting cells tend to allocate more ribosomes to translate mRNAs with higher  $k_i$  in poor nutrient conditions (Figure 4b). To find out what genes acquire more resources when the environment is shifted, we perform Gene Set Enrichment Analysis (GSEA) [15, 16] for wide type cells (Appendix F) and find that 8 gene sets from the Gene ontology (GO) [17, 18] database are enriched in both the GSEA where genes are ordered by  $k_i$  (denoted as  $k_i$ -ordered GSEA) and the GSEA where genes are ordered by  $\log_2$  fold change ( $\log_2\text{FC}$ ) of  $\chi_i$  (denoted as  $\log_2\text{FC}$ -ordered GSEA) (Figure 4d).

We find that five gene sets related to stress response are enriched in the regime of higher  $k_i$  and increasing  $\chi_i$  when the environment is changed from 2% glucose to 2% glycerol (Figure 4c). This is consistent with the environmental stress response (ESR) of *S. cerevisiae* as an adaptation to the shifts of environments [19]. We propose that higher translation speeds of stress response genes enable cells to respond rapidly to environmental changes, which is evolutionarily advantageous. We also find two gene sets related to the rRNA process are enriched in the regime of lower  $k_i$  and decreasing  $\chi_i$  (Figure 4c). This is consistent with the lower  $\phi_R$  in slow-growth conditions

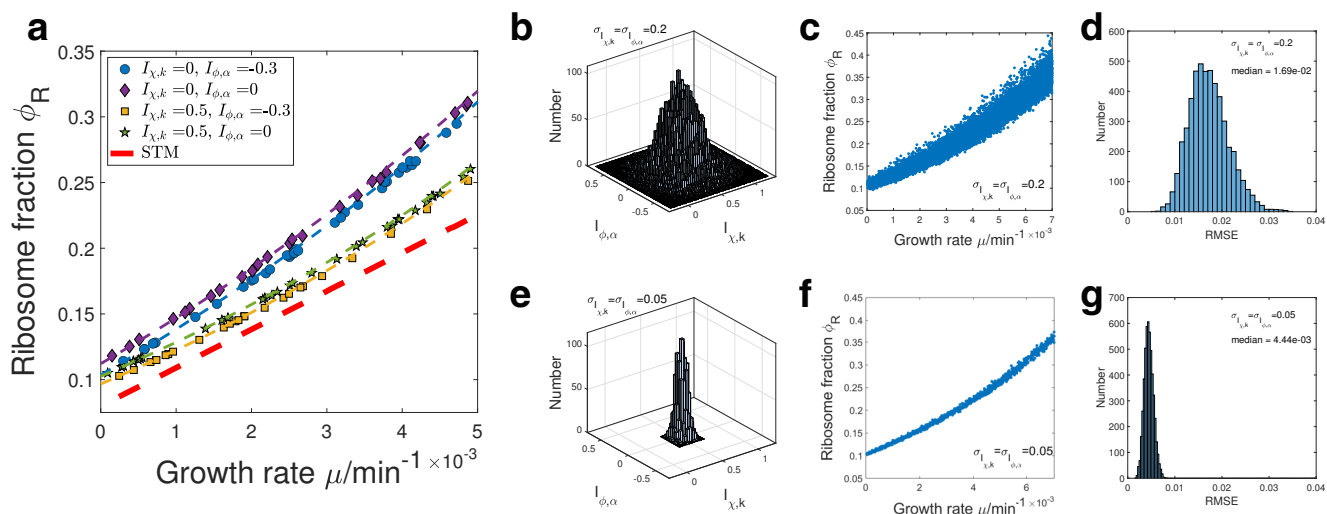

FIG. 3. Numerical simulations of the growth law curves with both heterogeneous translation speeds and protein degradation rates. (a) Numerical simulations with preselected  $I_{\chi,k}$  and  $I_{\phi,\alpha}$ . The red dashed line is the prediction of the STM and other dashed lines represent our model predictions. (b) and (e) Two-dimensional Gaussian distribution of randomly sampled  $I_{\chi,k}$  and  $I_{\phi,\alpha}$ . The mean of  $I_{\chi,k}$  is 0.5 and the mean of  $I_{\phi,\alpha}$  is 0. The standard deviations  $\sigma$  are indicated in the legends. (c) and (f) The resulting growth law curve where each point has randomly sampled  $I_{\chi,k}$  and  $I_{\phi,\alpha}$  from (b) and (e). (d) and (g) The distributions of the fitting RMSE corresponding to randomly chosen points in (c) and (f).

363 (Figure 4a). We also perform GSEA for  $\Delta$ Naa10 cells  
364 and get similar results (Supplementary Figure S2).

### 365 Applications of theories

366 An important application of our theories is that one  
367 can estimate the translation speeds by fitting the exper-  
368 imental growth law curve to our model prediction Eq.  
369 (12) (Appendix G). Because there are 6 unknown param-  
370 eters in the definition of  $c_1$ ,  $c_2$ , and  $c_3$  (Eq. (23-25)), we  
371 can estimate 3 of the parameters given the values of the  
372 other 3. For the *S. cerevisiae* data from Ref. [6], we use  
373 the experimentally measured degradation rate of riboso-  
374 mal proteins  $\alpha_R$  and the mass of ribosomal proteins  $m_R$   
375 as given. We approximate the  $\phi$ -averaged degradation  
376 rate  $\langle \alpha \rangle_\phi$  by  $\langle \alpha \rangle (1 + I_{\phi,\alpha})$  where  $I_{\phi,\alpha} = -0.33$ , and this is  
377 justified by the observations that  $I_{\phi,\alpha}$  is largely indepen-  
378 dent of environments (Figure 4a). We find that the fitted  
379 parameters  $c_1$ ,  $c_2$  and  $c_3$  having a wide range of 95% con-  
380 fidence intervals (Figure 5a) with  $\text{RMSE} = 1.35 \times 10^{-2}$ ,  
381 which suggests that the growth law curve is non-universal  
382 according to our simulations (Figure 3d). Indeed, the in-  
383 ferred values of  $\phi_0$ ,  $k_R$  and  $\langle k \rangle_\chi$  have very large error bars  
384 (Figure 5c). We also just fit the C-limiting data points in  
385 Figure 5a [6] and obtain similar results (Supplementary  
386 Figure S3).

387 We also apply our theories to *E. coli* [7] (Figure 5b).  
388 Because most proteins are non-degradable in bacteria  
389 [20, 21], we set  $\alpha_R$  and  $\langle \alpha \rangle_\phi$  as 0, and the mass of ribo-  
390 somal protein  $m_R = 8.07 \times 10^5$  Da [12]. In this case, the

391 fitted parameters have much smaller range of 95% confi-  
392 dence intervals with  $\text{RMSE} = 3.60 \times 10^{-3}$ . The estimated  
393  $k_R$ , and  $\langle k \rangle$  are consistent with previous studies [22–24]  
394 (Figure 5c). Our analysis of experimental data demon-  
395 strates that the translation speed of ribosomal proteins  
396 is indeed smaller than the  $\chi$ -averaged translation speed,  
397 in agreement with experimental observations [9]. Our re-  
398 sults suggest that *E. coli* has similar values of  $I_{\chi,k}$  and  
399  $I_{\phi,\alpha}$  in the chosen environments of Ref. [7] so that it has  
400 a universal growth law curve. In contrast, *S. cerevisiae*  
401 appears to have significantly different  $I_{\chi,k}$  and  $I_{\phi,\alpha}$  across  
402 different environments of Ref. [6] so that the growth law  
403 curve depends on the chosen environments and therefore  
404 non-universal.

### 405 Discussion

406 In this work, we go beyond the simple translation  
407 model and take account of the heterogeneous transla-  
408 tion speeds and finite protein degradation. Given the  
409 translation speeds and protein degradation rates, our  
410 model is completely general and virtually applies to any  
411 cells, including both proliferating cells ( $\mu > 0$ ) and non-  
412 proliferating cells ( $\mu = 0$ ). In this work, we mainly con-  
413 sider the scenario in which the growth rate changes due  
414 to the nutrient quality and the fraction of ribosomal pro-  
415 teins ( $\phi_R$ ) increases monotonically as the growth rate  
416 increases.

417 We demonstrate that the growth law curve is, in gen-  
418 eral, nonlinear and has the form Eq. (12). In particu-

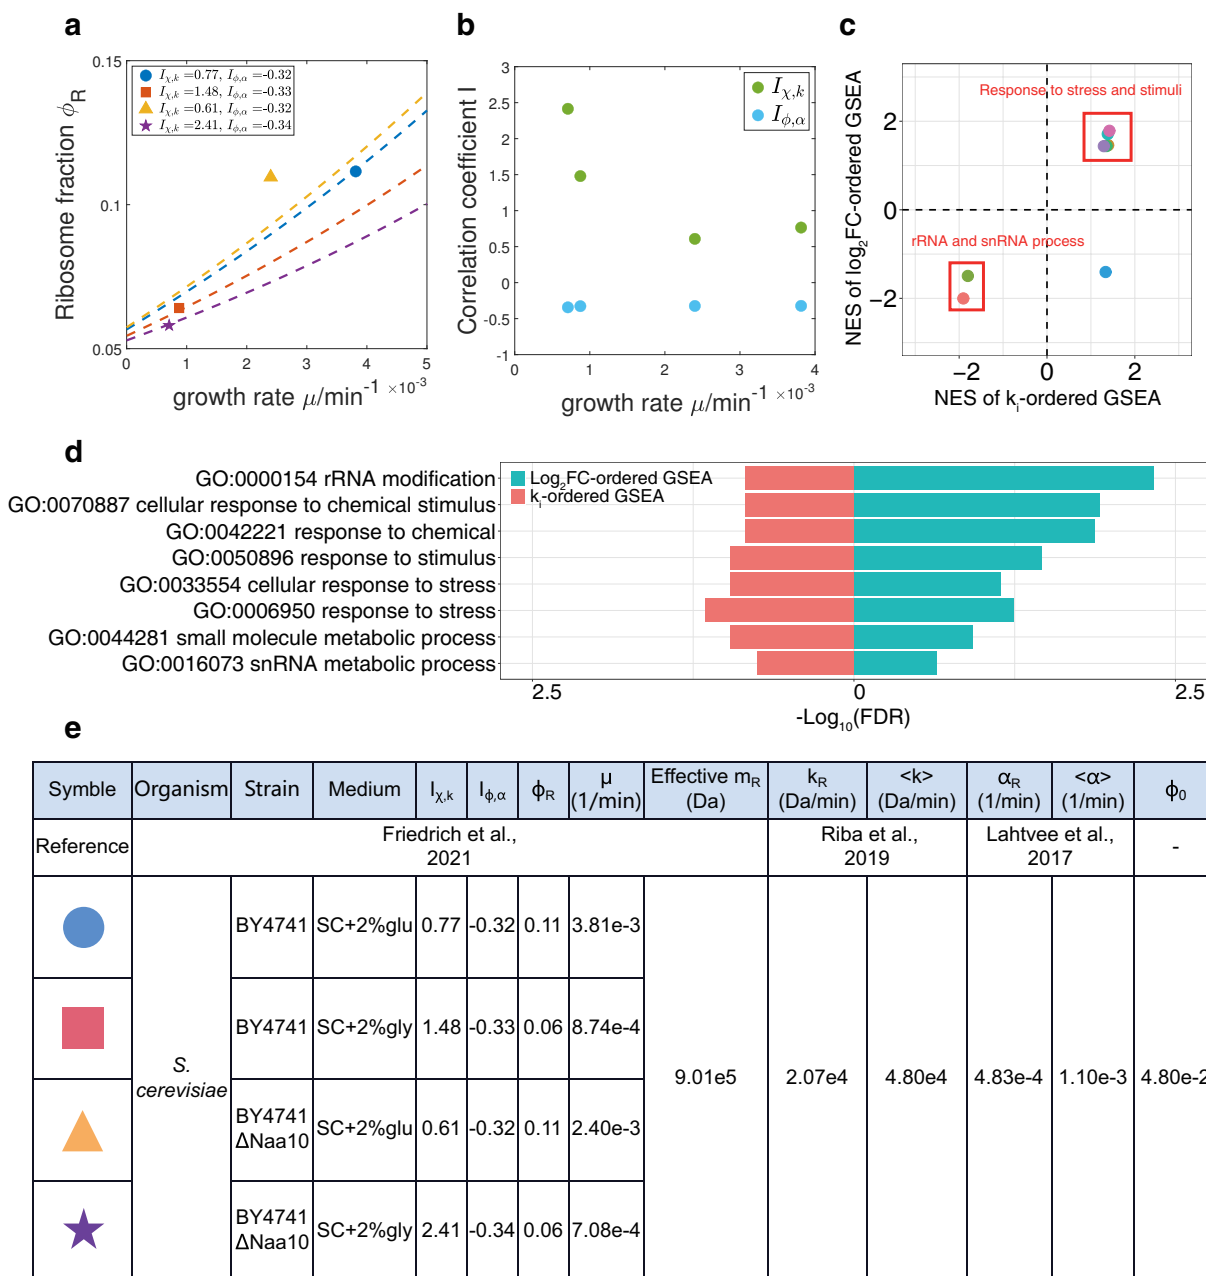

FIG. 4. Experimental analysis and theoretical predictions. (a) Experimental measured  $\phi_R$  of *S. cerevisiae* along with the predictions (dashed lines) of our model. (b) The growth rate dependence of the correlation coefficients  $I_{\chi,k}$  and  $I_{\phi,\alpha}$ . (c) The normalized enrichment score (NES) of GSEA of enriched gene sets. A positive NES of  $k_i$ -ordered GSEA means that the genes in the corresponding gene set are enriched in the regime of higher  $k_i$ . A positive NES of  $\log_2$ FC-ordered GSEA means that the genes in the corresponding gene set are enriched in the regime of increasing  $\chi_i$  when the nutrient changes from glucose to glycerol. (d) The enriched gene sets with their false discovery rate (FDR) q values of the single-sided permutation test. The higher the  $-\log_{10}(\text{FDR})$  value is, the more likely a gene set is enriched. (e) Summary of the multiple computed variables and parameters in the analysis of experimental data. Note that the effective mass of ribosomal proteins  $m_R$  is calculated based on molecular weights of ribosomal proteins detected in the proteome (Appendix F). SC, synthetic complete medium. Glu, glucose. Gly, glycerol.

419 lar, the main effect of heterogeneous translation speeds 423 STM. The actual shape of the growth law curve depends  
 420 is making the growth law curve up-bent relative to the 424 on two correlation coefficients: one is between the ribo-  
 421 STM. The main effect of protein degradation is reduc- 425 some allocations and the translation speeds ( $I_{\chi,k}$ ); the  
 422 ing the slope and increasing the intercept relative to the 426 other is between the protein mass fractions and protein

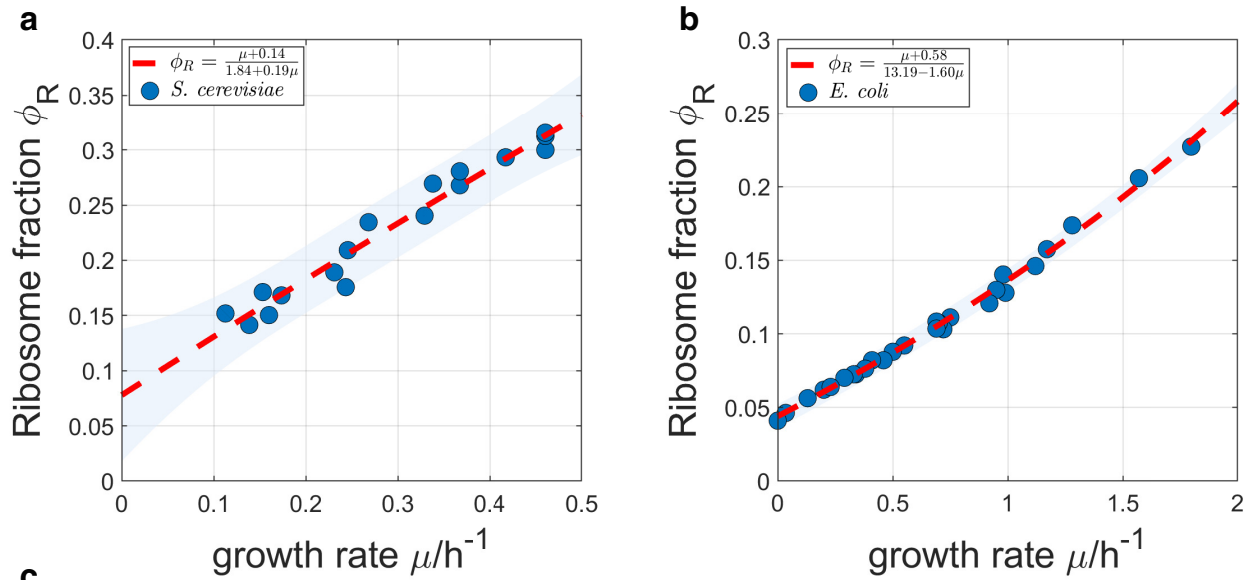

| Organism             | Fitting parameters                       |                                    |                                          |           | Known parameters |                                     |                  | Calculated values |                |                                   |                             |                             | Reference values                               |                                                                                                               | Data source                                                              |                                   |
|----------------------|------------------------------------------|------------------------------------|------------------------------------------|-----------|------------------|-------------------------------------|------------------|-------------------|----------------|-----------------------------------|-----------------------------|-----------------------------|------------------------------------------------|---------------------------------------------------------------------------------------------------------------|--------------------------------------------------------------------------|-----------------------------------|
|                      | $c_1$ with 95% confidence interval (1/h) | $c_2$ with 95% confidence interval | $c_3$ with 95% confidence interval (1/h) | RMSE      | $m_R$ (Da)       | $\langle \alpha \rangle_\phi$ (1/h) | $\alpha_R$ (1/h) | $\phi_0$          | $k_R$ (Da/min) | $\langle k \rangle_\chi$ (Da/min) | The range of $\phi_0$       | The range of $k_R$ (Da/min) | The range of $\langle k \rangle_\chi$ (Da/min) | $k_R$ (Da/min)                                                                                                |                                                                          | $\langle k \rangle_\chi$ (Da/min) |
| <i>S. cerevisiae</i> | $0.14 \pm 0.23$                          | $0.19 \pm 2.28$                    | $1.84 \pm 1.72$                          | $1.35e-2$ | $1.40e6$         | $4.42e-2$                           | $2.90e-2$        | $5.45e-2$         | $5.24e4$       | $4.25e4$                          | $-3.92$<br>-<br>$9.93$      | $1.25e3$<br>-<br>$3.48e12$  | $7.83e2$<br>-<br>$8.42e4$                      | $2.07e4$<br>-<br>Riba et al., 2019                                                                            | $7.78e4$<br>-<br>$1.65e5$<br>Riba et al., 2019<br>Friedrich et al., 2021 | Metzl et al., 2017                |
| <i>E. coli</i>       | $0.58 \pm 0.12$                          | $-1.60 \pm 0.79$                   | $13.19 \pm 1.74$                         | $3.60e-3$ | $8.07e5$         | 0                                   | 0                | $4.40e-2$         | $6.82e4$       | $1.77e5$                          | $3.10e-2$<br>-<br>$6.10e-2$ | $4.54e4$<br>-<br>$1.11e5$   | $1.54e5$<br>-<br>$2.01e5$                      | Order of magnitude: $10^4$ - $10^5$<br>Arkin et al., 1998<br>Gouy and Grantham 1980<br>Karpinetz et al., 2006 | Dai et al., 2016                                                         |                                   |

FIG. 5. The full model fits different datasets. (a) The non-linear fitting to data from Ref. [6]. The shadow represents the 95% prediction interval. (b) The non-linear fitting to data from Ref. [7]. The shadow is the same as in (a). (c) Detailed fitting results of (a) and (b). Note that the reference value of  $\langle k \rangle_\chi$  of (a) is approximated by  $\langle k \rangle (1 + I_{\chi,k})$  where the range of  $I_{\chi,k}$  can be found in Figure 4c.

degradation rates ( $I_{\phi,\alpha}$ ). By analyzing the dataset from [14], we found that  $I_{\phi,\alpha}$  is independent of growth rate, while  $I_{\chi,k}$  appears to be negatively correlated with the growth rate. This means that cells tend to produce proteins with faster translation speeds in slow-growth conditions, which can be an economic strategy and under evolutionary selection. Remarkably, our theoretical predictions of  $\phi_R$  can reasonably match the experimentally measured values [14], with a common fraction of inactive ribosomes  $\phi_0$ . Our results imply that the fraction of inactive ribosomes may be constant across different nutrient qualities.

We apply our model predictions to the growth law curves of *S. cerevisiae* [6] and *E. coli* [7]. In the former case, the fitting of data to our model prediction is subject to significant uncertainty. This agrees with the computed  $I_{\chi,k}$  that are variable across conditions using

the ribosome profiling and mass spectrometry data from [14]. In contrast, the fitting of *E. coli* data exhibits a much smaller uncertainty, suggesting that common  $I_{\chi,k}$  and  $I_{\phi,\alpha}$  may apply to all the nutrient qualities used in the experiments of Ref. [7]. This is to be tested when genome-wide measurements, such as translation speeds, of *E. coli* are available in the future.

We remark that in the absence of heterogeneous translation speeds and protein degradation, the mass fraction of protein  $i$ ,  $\phi_i$  must equal the ribosome allocation  $\chi_i$ . Indeed, these two datasets are often highly correlated among proteins in *E. coli* [12, 25]. However, in our more realistic models,  $\phi_i$  depends on the translation speed and protein degradation rate. Given the same  $\chi_i$ , proteins with higher translation speeds or lower degradation rates should have higher mass fractions (Appendix A). We note that using the current genome-wide datasets of



461 *S. cerevisiae*, the predicted protein mass fractions  $\phi_{i,pre}$  494  
 462 based on the ribosome allocations  $\chi_i$  [14], the translation  
 463 speeds  $k_i$  [9], and the protein degradation rates  $\alpha_i$  [11] 495  
 464 do not correlate strong enough with the measured  $\phi_i$  as 496  
 465 expected. We note that these datasets are from different  
 466 references, and the deviation is likely due to the noise in  
 467 the measurements of  $k_i$  (Supplementary Table S2). We  
 468 expect our theories to be further verified when more ac- 497  
 469 curate measurements of translation speeds are available. 498  
 470 For simplicity, in this work, we assume that the trans-  
 471 lation speeds and protein degradation rates are invariant  
 472 as the nutrient quality changes. Therefore, we can use the  
 473 two correlation coefficients  $I_{\chi,k}$  and  $I_{\phi,\alpha}$  to characterize a  
 474 particular environment. We remark that our model can  
 475 be generalized to more complex scenarios in which the  
 476 translation speeds or protein degradation rates depend  
 477 on the growth rate [7]. In this case, one just needs to in-  
 478 clude four additional environmental-specific parameters:  
 479  $k_R$ ,  $\langle k \rangle$ ,  $\alpha_R$ , and  $\langle \alpha \rangle$ .

## 480 APPENDIX

### 481 A. Derivation of Equation (2)

482 Based on the definition of  $\phi_i$ , the changing rates of  $\phi_i$   
 483 is

$$\frac{d\phi_i}{dt} = \frac{\frac{dM_i}{dt}M - \frac{dM}{dt}M_i}{M^2} = \frac{\frac{dM_i}{dt}}{M} - \frac{\frac{dM}{dt}}{M} \frac{M_i}{M}. \quad (13)$$

484 In the steady state,  $\phi_i$  doesn't change so that Eq. (13) 507  
 485 equals 0. Combined with the definition of growth rate 508  
 486 and Eq. (1), we obtain

$$\frac{d\phi_i}{dt} = \frac{k_i\chi_i(\phi_R - \phi_0)}{m_R} - \alpha_i\phi_i - \mu\phi_i = 0, \quad (14)$$

487 which leads to Eq. (2). In the steady state, we can write  
 488  $\phi_i$  using Eq. (2) as

$$\phi_i = \frac{k_i\chi_i/(\mu + \alpha_i)}{\sum_j k_j\chi_j/(\mu + \alpha_j)}. \quad (15)$$

489 We can also rewrite Eq. (2) using  $\sum_i \phi_i = 1$  as

$$1 = \frac{\phi_R - \phi_0}{m_R} \sum_i \frac{k_i\chi_i}{(\mu + \alpha_i)}. \quad (16)$$

### 490 B. Derivation of Equation (3)

491 We rewrite Eq. (2) as

$$m_R\mu\phi_i + m_R\alpha_i\phi_i = k_i\chi_i(\phi_R - \phi_0). \quad (17)$$

492 We then sum up for all proteins and obtain

$$m_R\mu + m_R \sum_{i=1}^n \alpha_i\phi_i = (\phi_R - \phi_0) \sum_{i=1}^n k_i\chi_i, \quad (18)$$

493 which leads to Eq. (3).

### C. Derivation of Equation (4)

494 In deriving Eq. (4), we neglect protein degradation  
 495 and rewrite Eq. (3) as

$$\phi_R = \frac{m_R\mu}{k_R\chi_R + (1 - \chi_R)\langle k \rangle_\chi} + \phi_0. \quad (19)$$

497 Meanwhile, we compute the growth rate using the auto-  
 498 catalytic nature of ribosomal proteins,

$$\mu = \frac{\frac{dM_R}{dt}}{M_R} = \frac{k_R\chi_R}{m_R} \left(1 - \frac{\phi_0}{\phi_R}\right). \quad (20)$$

499 The above equation allows us to replace  $\chi_R$  by  $\mu$  in Eq.  
 500 (19), from which we obtain Eq. (4).

### D. Derivation of the full model

502 In this section we derive the full model considering  
 503 both the heterogeneities in the translation speeds and  
 504 protein degradation rates. We rewrite Eq. (3) in the  
 505 main text as

$$\phi_R = \frac{m_R[\mu + \alpha_R\phi_R + (1 - \phi_R)\langle \alpha \rangle_\phi]}{k_R\chi_R + (1 - \chi_R)\langle k \rangle_\chi} + \phi_0. \quad (21)$$

506 Meanwhile, the growth rate is

$$\mu = \frac{k_R\chi_R}{m_R} \left(1 - \frac{\phi_0}{\phi_R}\right) - \alpha_R. \quad (22)$$

507 Combining Eq. (21) and Eq. (22) allows us to solve  $\phi_R$   
 508 as a function of  $\mu$  and we obtain Eq. (12)

$$\phi_R = \frac{\mu + c_1}{c_2\mu + c_3}, \quad (12)$$

509 where

$$c_1 = \frac{\langle k \rangle_\chi \phi_0}{m_R} + \langle \alpha \rangle_\phi, \quad (23)$$

$$c_2 = 1 - \frac{\langle k \rangle_\chi}{k_R}, \quad (24)$$

$$c_3 = \langle \alpha \rangle_\phi - \frac{\alpha_R \langle k \rangle_\chi}{k_R} + \frac{\langle k \rangle_\chi}{m_R}. \quad (25)$$

It is straightforward to find that the condition for Eq.  
 (12) to be monotonically increasing is that  $c_3 > c_1c_2$ .  
 Using the above expressions, we find that

$$c_3 - c_1c_2 = \frac{\langle k \rangle_\chi(1 - \phi_0)}{m_R} + \frac{\langle k \rangle_\chi^2 \phi_0}{k_R m_R} + \frac{\langle k \rangle_\chi(\langle \alpha \rangle_\phi - \alpha_R)}{k_R}. \quad (26)$$

510 We find that the first two terms are always positive, and  
 511 the last term is positive as long as  $I_{\alpha,\phi}$  is not too close to  
 512  $-1$ . Therefore, the  $\phi_R(\mu)$  curve must be monotonically  
 513 increasing. It is straightforward to find that the second  
 514 derivative of the  $\phi_R(\mu)$  curve is proportional to  $(c_1c_2 -$   
 515  $c_3)c_2$ , which is always positive as long as  $I_{\chi,k}$  is not too  
 516 close to  $-1$ .

## E. Details of the numerical simulations

We summarize the parameters we use in the numerical simulations in Supplementary Table S1. We consider a cell with 4000 genes. We set the elongation speed  $k_i$  and the degradation rates  $\alpha_i$  of non-ribosomal genes to follow lognormal distributions. We set  $k_R = 2.07 \times 10^4$  Da/min,  $\langle k \rangle = 4.80 \times 10^4$  Da/min,  $\alpha_R = 4.83 \times 10^{-4} \text{ min}^{-1}$ , and  $\langle \alpha \rangle = 1.10 \times 10^{-3} \text{ min}^{-1}$  as the experimentally measured values of *S. cerevisiae* [9, 11]. The coefficients of variation (CV) of the lognormal distributions can be found in Supplementary Table S1. In all simulations, we set  $\phi_0 = 0.08$ . We note that in Figure 2a, we set  $\alpha_i = 0$  for all proteins and in Figure 2b, we set  $k_i = \langle k \rangle$  for all proteins. We note that for given  $I_{\chi,k}$  and  $I_{\phi,\alpha}$ ,  $k_i$  and  $\alpha_i$  are fixed for environments with different  $\chi_i$ .

To simulate a random environment, we generate a random  $\chi_R$ . Meanwhile, a lognormal distribution of  $\chi_i$  of non-ribosomal genes is also randomly generated. The CV of the lognormal distribution is included in Supplementary Table S1. We then search for the  $\phi_R$  and  $\mu$  that simultaneously satisfy Eq. (22) and Eq. (16).  $\phi_i$ ,  $I_{\chi,k}$  and  $I_{\phi,\alpha}$  are then calculated using Eq. (3), Eq. (7) and Eq. (11), respectively. For a chosen pair of  $I_{\chi,k}$  and  $I_{\phi,\alpha}$ , the predicted  $\phi_R(\mu)$  curve is obtained using Eq. (12).

To obtain Figure. 2d, g, we randomly sample 20 points from Fig. 2c, f respectively, fit them using Eq. (12), and calculate the resulting RMSE. We repeat the above process 5000 times.

## F. Details of the experimental data analysis

For the ribosome profiling data [14], we first trim the adapter with Cutadapt (version 3.4) [26]. Then we use Bowtie2 (version 2.4.2) [27] to eliminate ribosomal RNAs (rRNA) as mentioned in [28]. The cleaned reads are then mapped to *S. cerevisiae* genome R64.1.1 with HISAT2 (version 2.2.1) [29]. Read counts are then generated with featureCount (version 2.0.1) [30]. The ribosome allocation  $\chi_i$  is calculated based on the count fraction.

For the proteomics data [14], we perform the absolute quantification (or the in-sample relative quantification) of proteins based on the intensities of peptides using xTop (version 1.2) [12]. The intensity ratio of 2 proteins in the same sample of proteomics data does not directly represent the real abundance (either the mass or the copy number) ratio so that the abundance fraction can not be replaced with the intensity fraction [12, 31]. XTop is a novel software that accurately calculates the in-sample relative protein copy number with the maximum a posteriori probability (MAP) algorithm [12]. We then calculate all proteins' mass fraction  $\phi_i$  with the xTop results and the protein molecular mass. In [12], the authors further calibrated  $\phi_i$  with ribosome profiling data assuming homogeneous  $k_i$ . In this work, we alternatively calibrate

$\phi_i$  with  $L^{-0.57}$  where  $L$  is the protein length, as mentioned in [12]. Calibration with  $L^{-0.57}$  is independent of ribosome profiling data, although it reduces the distance between  $\chi_i$  and calibrated  $\phi_i$  [12]. We also show the result with calibration of  $L^{-1}$  or without calibration in Supplementary Figure S1b, c. To compute  $\phi_R$ , we sum up the  $\phi_i$  of all proteins annotated as the cytoplasmic ribosomal protein in Saccharomyces Genome Database (SGD).

For the elongation speed  $k_i$ , we first calculate  $v_i$  as mentioned in [9].  $k_i$  is then calculated using the relationship  $k_i = v_i a_i$ . For the degradation rate  $\alpha_i$ , data is obtained from [11]. We calculate the experimental  $I_{\chi,k}$ ,  $I_{\phi,\alpha}$ ,  $\langle k \rangle$  and  $\langle \alpha \rangle$  for non-ribosomal genes that exist in all data sets of  $\chi_i$ ,  $\phi_i$ ,  $k_i$  and  $\alpha_i$ . We also calculate the  $\chi$ -averaged  $k$  of ribosomal proteins as  $k_R$  and  $\phi$ -averaged  $\alpha$  of ribosomal proteins as  $\alpha_R$ .

For the molecular mass of the ribosome, we calculate the effective  $m_R$ . Considering the efficiency of the mass spectrometry (MS), not all proteins can be detected. Therefore, we define the effective  $m_R$  as the molecular weights of ribosomal proteins detected in the proteome. Because most of the ribosomal proteins can be expressed by two paralogous genes in *S. cerevisiae*, we count the average molecular mass when both proteins of the paralogs are detected in the proteome. We also show our predictions of  $\phi_R$  using the real ribosome mass ( $m_R = 1.40e6$  Da) in Supplementary Figure S1a.

For the growth rate  $\mu$ , it is obtained from the growth curve, OD<sub>600</sub> versus time with the method mentioned in [32]. Briefly, the slopes of  $\ln(\text{OD}_{600})$  versus time in 5-point windows are calculated. Then windows with slopes that are at least 95% of the maximum slope are extracted. The slope of points within these windows is calculated as the growth rate. With these results, we predict the corresponding  $\phi_R(\mu)$  curves and compare them with the experimental data points.

We further calculate the predicted mass fraction  $\phi_{i,pre}$  of non-ribosomal proteins with Eq. (15). Pearson correlation coefficients  $\rho$  between  $\phi_{i,pre}$  and  $\phi_i$  are calculated. We also compute  $\rho$  under the assumptions that  $\alpha_i = 0$  or  $k_i = \langle k \rangle$  (Supplementary Table S2).

For GSEA analysis, we first perform the differential expression analysis on the ribosome profiling data of WT or  $\Delta\text{Naa10}$  cells using the package DEseq2 (version 1.24.0) [33] in R (version 3.6.1). The  $\log_2$  fold changes of counts when cells changed from SC+2% glucose to SC+2% glycerol as well as the FDR q values are calculated. Ribosomal genes and genes with FDR q value  $> 0.05$  are eliminated. We then pick out genes that also exist in the data sets of  $k_i$ . GSEA on these genes are then performed twice using the R package clusterProfiler (version 3.12.0) [34] and org.Sc.sgd.db (version 3.8.2) [35]. In the first GSEA, genes are ordered by the  $\log_2$  fold change (denoted as  $\log_2\text{FC}$ -ordered GSEA). In the second GSEA, genes are ordered by  $k_i$  (denoted as  $k_i$ -ordered GSEA). We then

625 find the common gene sets from GO database [17, 18] 630  
 626 enriched in these two GSEA. The cut-off criteria are set  
 627 as the p value < 0.05 and the FDR q value < 0.25. The  
 628 number of permutations used in the analysis is 1e5.

## H. A summary of the variables used in this work

| Variables                     | Meaning                                                                                                                      |
|-------------------------------|------------------------------------------------------------------------------------------------------------------------------|
| $N$                           | number of genes                                                                                                              |
| $M_i$                         | mass of protein $i$                                                                                                          |
| $M$                           | total mass of all proteins                                                                                                   |
| $k_i$                         | the mass of translated protein $i$ per unit time                                                                             |
| $k_R$                         | the mass of translated ribosomal protein per unit time                                                                       |
| $\langle k \rangle$           | the arithmetic average mass of translated protein mass over non-ribosomal proteins per unit time                             |
| $\langle k \rangle_\chi$      | the $\chi$ -weighted average mass of translated non-ribosomal proteins per unit time                                         |
| $\chi_i$                      | the fraction of active ribosomes producing protein $i$ in the pool of total active ribosomes                                 |
| $\chi_R$                      | the fraction of active ribosomes producing themselves in the pool of total active ribosomes                                  |
| $\tilde{\chi}_i$              | the fraction of active ribosomes producing protein $i$ in the pool of active ribosomes translating non-ribosomal proteins    |
| $R$                           | total number of ribosomes                                                                                                    |
| $R_0$                         | total number of inactive ribosomes                                                                                           |
| $\alpha_i$                    | degradation rate of protein $i$                                                                                              |
| $\alpha_R$                    | degradation rate of the ribosomal protein                                                                                    |
| $\langle \alpha \rangle$      | the arithmetic average degradation rate over non-ribosomal proteins                                                          |
| $\langle \alpha \rangle_\phi$ | the $\phi$ -weighted average degradation rate over non-ribosomal proteins                                                    |
| $\phi_i$                      | the mass fraction of protein $i$                                                                                             |
| $\phi_R$                      | the mass fraction of ribosomes                                                                                               |
| $\phi_0$                      | the mass fraction of inactive ribosomes                                                                                      |
| $\tilde{\phi}_i$              | the mass fraction of non-ribosomal protein $i$ in the pool of all non-ribosomal proteins                                     |
| $m_R$                         | molecular mass of ribosome                                                                                                   |
| $\mu$                         | the growth rate                                                                                                              |
| $I_{\chi,k}$                  | the metric quantifying the correlation between the ribosome allocations and the translation speeds of non-ribosomal proteins |
| $I_{\phi,\alpha}$             | the metric quantifying the correlation between the mass fractions and the degradation rates of non-ribosomal proteins        |

## G. Details of fitting in Figure 5

630 Nonlinear fitting is performed with MATLAB (version  
 631 R2020b). We obtain the fitting parameters  $c_1$ ,  $c_2$  and  
 632  $c_3$  with their 95% confidence intervals, and then com-  
 633 pute  $\phi_0$ ,  $k_R$  and  $\langle k \rangle_\chi$  using Eqs. (23, 24, 25). To com-  
 634 pute the ranges of these values, we numerically find the  
 635 maximum and the minimum value of the multivariate  
 636 functions  $\phi_0(c_1, c_2, c_3)$ ,  $k_R(c_1, c_2, c_3)$  and  $\langle k \rangle_\chi(c_1, c_2, c_3)$   
 637 as their upper and lower bounds, where the ranges of  $c_1$ ,  
 638  $c_2$  and  $c_3$  are their 95% confidence intervals.

- [1] F. C. Neidhardt and B. Magasanik, Studies on the role of ribonucleic acid in the growth of bacteria, *Biochimica et biophysica acta* **42**, 99 (1960).
- [2] O. Maaløe, Regulation of the protein-synthesizing machinery—ribosomes, trna, factors, and so on, in *Biological regulation and development* (Springer, 1979) pp. 487–542.
- [3] H. Bremer and P. P. Dennis, Modulation of chemical composition and other parameters of the cell at different exponential growth rates, *EcoSal Plus* **3** (2008).

- [4] M. Scott, C. W. Gunderson, E. M. Mateescu, Z. Zhang, and T. Hwa, Interdependence of Cell Growth and Gene Expression: Origins and Consequences, *Science* **330**, 1099 (2010).
- [5] S. Hui, J. M. Silverman, S. S. Chen, D. W. Erickson, M. Basan, J. Wang, T. Hwa, and J. R. Williamson, Quantitative proteomic analysis reveals a simple strategy of global resource allocation in bacteria, *Molecular Systems Biology* **11**, 784 (2015).
- [6] E. Metzl-Raz, M. Kafri, G. Yaakov, I. Soifer, Y. Gurvich, and N. Barkai, Principles of cellular resource allocation revealed by condition-dependent proteome profiling, *Elife* **6**, e28034 (2017).
- [7] X. Dai, M. Zhu, M. Warren, R. Balakrishnan, V. Patsalo, H. Okano, J. R. Williamson, K. Fredrick, Y.-P. Wang, and T. Hwa, Reduction of translating ribosomes enables *escherichia coli* to maintain elongation rates during slow growth, *Nature microbiology* **2**, 1 (2016).
- [8] S. Klumpp, J. Dong, and T. Hwa, On ribosome load, codon bias and protein abundance, *PLoS ONE* **7**, e48542 (2012).
- [9] A. Riba, N. Di Nanni, N. Mittal, E. Arhné, A. Schmidt, and M. Zavolan, Protein synthesis rates and ribosome occupancies reveal determinants of translation elongation rates, *Proceedings of the national academy of sciences* **116**, 15023 (2019).
- [10] O. Gefen, O. Fridman, I. Ronin, and N. Q. Balaban, Direct observation of single stationary-phase bacteria reveals a surprisingly long period of constant protein production activity, *Proceedings of the National Academy of Sciences* **111**, 556 (2014).
- [11] P.-J. Lahtvee, B. J. Sánchez, A. Smialowska, S. Kasvandik, I. E. Elseman, F. Gatto, and J. Nielsen, Absolute quantification of protein and mrna abundances demonstrate variability in gene-specific translation efficiency in yeast, *Cell Systems* **4**, 495 (2017).
- [12] M. Mori, Z. Zhang, A. Banaei-Esfahani, J.-B. Lalanne, H. Okano, B. C. Collins, A. Schmidt, O. T. Schubert, D.-S. Lee, G.-W. Li, R. Aebersold, T. Hwa, and C. Ludwig, From coarse to fine: the absolute *escherichia coli* proteome under diverse growth conditions, *Molecular Systems Biology* **17**, e9536 (2021).
- [13] G.-W. Li, D. Burkhardt, C. Gross, and J. S. Weissman, Quantifying absolute protein synthesis rates reveals principles underlying allocation of cellular resources, *Cell* **157**, 624 (2014).
- [14] U. A. Friedrich, M. Zedan, B. Hessling, K. Fenzl, L. Gillet, J. Barry, M. Knop, G. Kramer, and B. Bukau, N $\alpha$ -terminal acetylation of proteins by nata and natb serves distinct physiological roles in *saccharomyces cerevisiae*, *Cell Reports* **34**, 108711 (2021).
- [15] A. Subramanian, P. Tamayo, V. K. Mootha, S. Mukherjee, B. L. Ebert, M. A. Gillette, A. Paulovich, S. L. Pomeroy, T. R. Golub, E. S. Lander, and J. P. Mesirov, Gene set enrichment analysis: A knowledge-based approach for interpreting genome-wide expression profiles, *Proceedings of the National Academy of Sciences* **102**, 15545 (2005).
- [16] V. K. Mootha, C. M. Lindgren, K.-F. Eriksson, A. Subramanian, S. Sihag, J. Lehar, P. Puigserver, E. Carlsson, M. Ridderstråle, E. Laurila, and et al., Pgc-1 $\alpha$ -responsive genes involved in oxidative phosphorylation are coordinately downregulated in human diabetes, *Nature Genetics* **34**, 267–273 (2003).
- [17] M. Ashburner, C. A. Ball, J. A. Blake, D. Botstein, H. Butler, J. M. Cherry, A. P. Davis, K. Dolinski, S. S. Dwight, J. T. Eppig, M. A. Harris, D. P. Hill, L. Issel-Tarver, A. Kasarskis, S. Lewis, J. C. Matese, J. E. Richardson, M. Ringwald, G. M. Rubin, and G. Sherlock, Gene ontology: tool for the unification of biology, *Nature Genetics* **25**, 25 (2000).
- [18] S. Carbon, E. Douglass, B. M. Good, D. R. Unni, N. L. Harris, C. J. Mungall, S. Basu, R. L. Chisholm, R. J. Dodson, E. Hartline, P. Fey, P. D. Thomas, L.-P. Albou, D. Ebert, M. J. Kesling, H. Mi, A. Muruganujan, X. Huang, T. Mushayahama, S. A. LaBonte, D. A. Siegele, G. Antonazzo, H. Attrill, N. H. Brown, P. Garapati, S. J. Marygold, V. Trovisco, G. dos Santos, K. Falls, C. Tabone, P. Zhou, J. L. Goodman, V. B. Strelets, J. Thurmond, P. Garmiri, R. Ishtiaq, M. Rodríguez-López, M. L. Acencio, M. Kuiper, A. Lægred, C. Logie, R. C. Lovering, B. Kramarz, S. C. C. Saverimuttu, S. M. Pinheiro, H. Gunn, R. Su, K. E. Thurlow, M. Chibucos, M. Giglio, S. Nadendla, J. Munro, R. Jackson, M. J. Duesbury, N. Del-Toro, B. H. M. Meldal, K. Paneerselvam, L. Perfetto, P. Porras, S. Orchard, A. Shrivastava, H.-Y. Chang, R. D. Finn, A. L. Mitchell, N. D. Rawlings, L. Richardson, A. Sangrador-Vegas, J. A. Blake, K. R. Christie, M. E. Dolan, H. J. Drabkin, D. P. Hill, L. Ni, D. M. Sitnikov, M. A. Harris, S. G. Oliver, K. Rutherford, V. Wood, J. Hayles, J. Bähler, E. R. Bolton, J. L. D. Pons, M. R. Dwinell, G. T. Hayman, M. L. Kaldunski, A. E. Kwitek, S. J. F. Laulederkind, C. Plasterer, M. A. Tutaj, M. VEDI, S.-J. Wang, P. D'Eustachio, L. Matthews, J. P. Balhoff, S. A. Aleksander, M. J. Alexander, J. M. Cherry, S. R. Engel, F. Gondwe, K. Karra, S. R. Miyasato, R. S. Nash, M. Simison, M. S. Skrzypek, S. Weng, E. D. Wong, M. Feuermann, P. Gaudet, A. Morgat, E. Bakker, T. Z. Berardini, L. Reiser, S. Subramaniam, E. Huala, C. N. Arighi, A. Auchincloss, K. Axelsen, G. Argoud-Puy, A. Bateman, M.-C. Blatter, E. Boutet, E. Bowler, L. Breuza, A. Bridge, R. Britto, H. Bye-A-Jee, C. C. Casas, E. Coudert, P. Denny, A. Estreicher, M. L. Famiglietti, G. Georgioui, A. Gos, N. Gruaz-Gumowski, E. Hatton-Ellis, C. Hulo, A. Ignatchenko, F. Jungo, K. Laiho, P. L. Mercier, D. Lieberherr, A. Lock, Y. Lussi, A. MacDougall, M. Magrane, M. J. Martin, P. Masson, D. A. Natale, N. Hyka-Nouspikel, S. Orchard, I. Pedruzzi, L. Pourcel, S. Poux, S. Pundir, C. Rivoire, E. Speretta, S. Sundaram, N. Tyagi, K. Warner, R. Zaru, C. H. Wu, A. D. Diehl, J. N. Chan, C. Grove, R. Y. N. Lee, H.-M. Muller, D. Raciti, K. V. Auken, P. W. Sternberg, M. Berriman, M. Paulini, K. Howe, S. Gao, A. Wright, L. Stein, D. G. Howe, S. Toro, M. Westerfield, P. Jaiswal, L. Cooper, and J. Elser, The gene ontology resource: enriching a Gold mine, *Nucleic Acids Research* **49**, D325 (2020).
- [19] J. Gutin, A. Sadeh, A. Rahat, A. Aharoni, and N. Friedman, Condition-specific genetic interaction maps reveal crosstalk between the camp/pka and the hog mapk pathways in the activation of the general stress response, *Molecular Systems Biology* **11**, 829 (2015).
- [20] D. W. Erickson, S. J. Schink, V. Patsalo, J. R. Williamson, U. Gerland, and T. Hwa, A global resource allocation strategy governs growth transition kinetics of *escherichia coli*, **551**, 119 (2017).

- 778 [21] A. L. Goldberg and A. C. S. John, Intracellular protein 802  
779 degradation in mammalian and bacterial cells: Part 2, 803  
780 **45**, 747 (1976). 804
- 781 [22] A. Arkin, J. Ross, and H. H. McAdams, Stochastic kinetic 805  
782 analysis of developmental pathway bifurcation in 806  
783 phage lambda-infected escherichia coli cells, **149**, 1633 807  
784 (1998). 808
- 785 [23] M. Gouy and R. Grantham, Polypeptide elongation and 809  
786 trna cycling in escherichia coli: a dynamic approach, 810  
787 FEBS letters **115**, 151 (1980). 811
- 788 [24] T. V. Karpinets, D. J. Greenwood, C. E. Sams, and J. T. 812  
789 Ammons, RNA:protein ratio of the unicellular organ- 813  
790 ism as a characteristic of phosphorous and nitrogen sto- 814  
791 ichiometry and of the cellular requirement of ribosomes 815  
792 for protein synthesis **4**, 10.1186/1741-7007-4-30 (2006). 816
- 793 [25] T.-Y. Liu, H. H. Huang, D. Wheeler, Y. Xu, J. A. Wells, 817  
794 Y. S. Song, and A. P. Wiita, Time-resolved proteomics 818  
795 extends ribosome profiling-based measurements of pro- 819  
796 tein synthesis dynamics, Cell Systems **4**, 636 (2017). 820
- 797 [26] M. Martin, Cutadapt removes adapter sequences from 821  
798 high-throughput sequencing reads, EMBnet.journal **17**, 822  
799 10 (2011). 823
- 800 [27] B. Langmead and S. L. Salzberg, Fast gapped-read align- 824  
801 ment with bowtie 2, Nature methods **9**, 357 (2012). 825
- 826
- 827 [28] C. V. Galmozzi, D. Merker, U. A. Friedrich, K. Döring, 827  
and G. Kramer, Selective ribosome profiling to study in- 828  
teractions of translating ribosomes in yeast, Nature pro-  
tocols **14**, 2279 (2019).
- [29] D. Kim, J. M. Paggi, C. Park, C. Bennett, and S. L. Salzberg, Graph-based genome alignment and genotyping with hisat2 and hisat-genotype, Nature biotechnology **37**, 907 (2019).
- [30] Y. Liao, G. K. Smyth, and W. Shi, featureCounts: an efficient general purpose program for assigning sequence reads to genomic features, Bioinformatics **30**, 923 (2013).
- [31] F. Calderón-Celis, J. R. Encinar, and A. Sanz-Medel, Standardization approaches in absolute quantitative proteomics with mass spectrometry, Mass spectrometry reviews **37**, 715 (2018).
- [32] B. G. Hall, H. Acar, A. Nandipati, and M. Barlow, Growth Rates Made Easy, Molecular Biology and Evolution **31**, 232 (2013).
- [33] M. I. Love, W. Huber, and S. Anders, Moderated estimation of fold change and dispersion for rna-seq data with deseq2, Genome Biology **15**, 550 (2014).
- [34] G. Yu, L.-G. Wang, Y. Han, and Q.-Y. He, clusterProfiler: an r package for comparing biological themes among gene clusters, OMICS: A Journal of Integrative Biology **16**, 284 (2012).
- [35] M. Carlson, org.sc.sgd.db: Genome wide annotation for yeast, (2019), r package version 3.8.2.
